# Supplementary material
Source: HighWire-hosted journal article supplement (https://www.life-science-alliance.org/content/5/5/e202201379/F1)

J.Repeat n.1

Supplementary Figure 1.

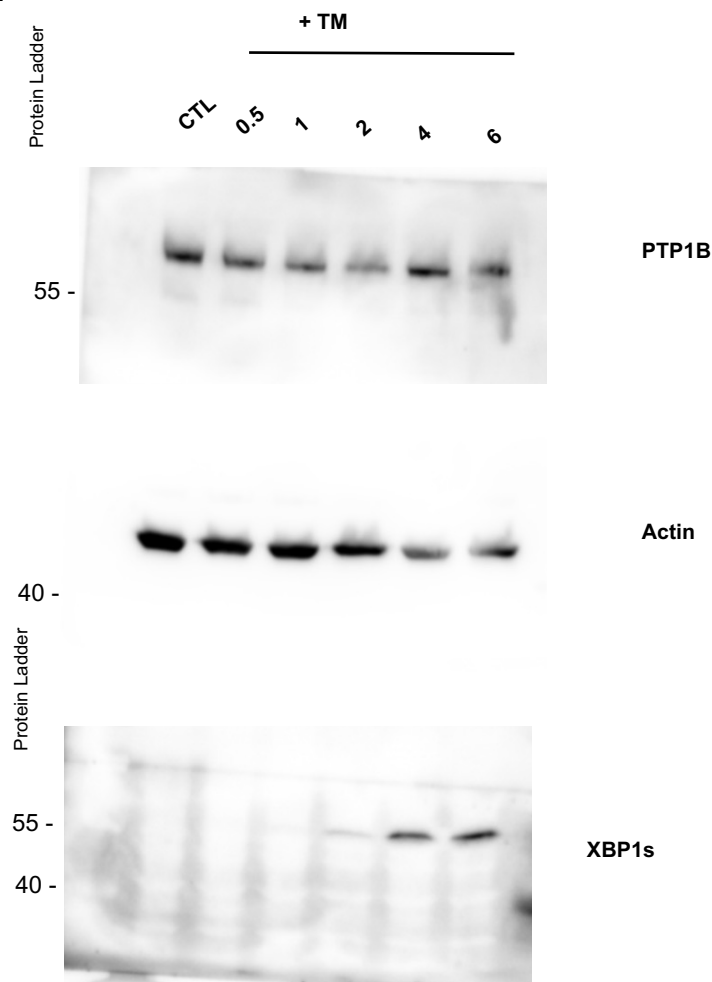

**J.Repeat n.2**  
**In Fig.S1J**

Supplementary Figure 1.

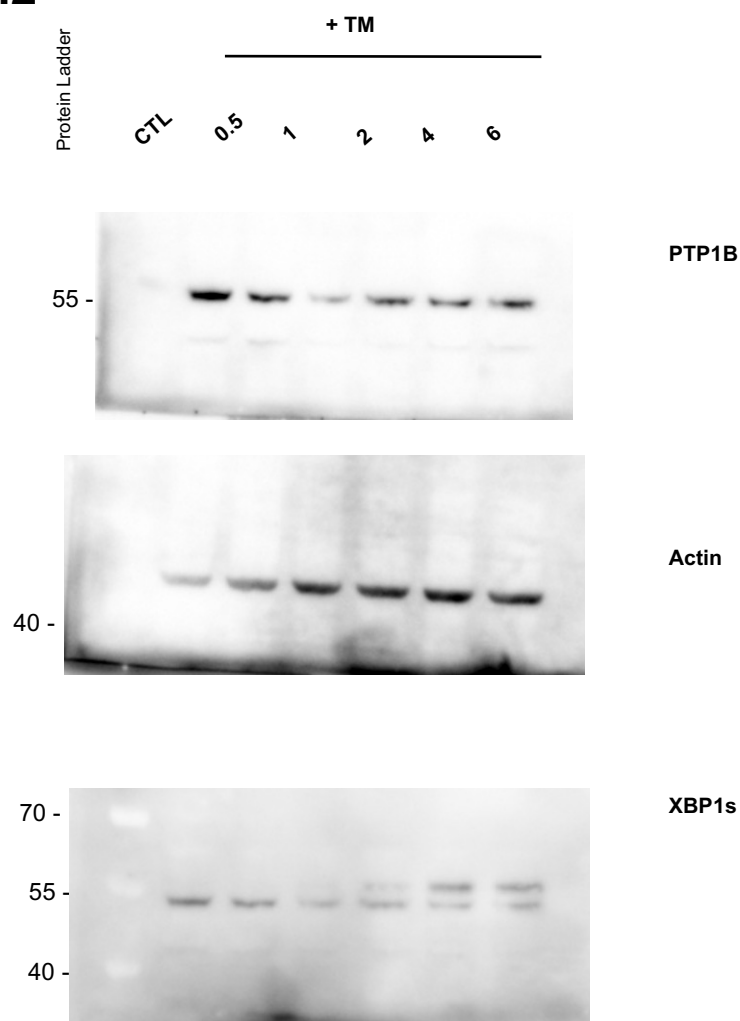

J.Repeat n.3

Supplementary Figure 1.

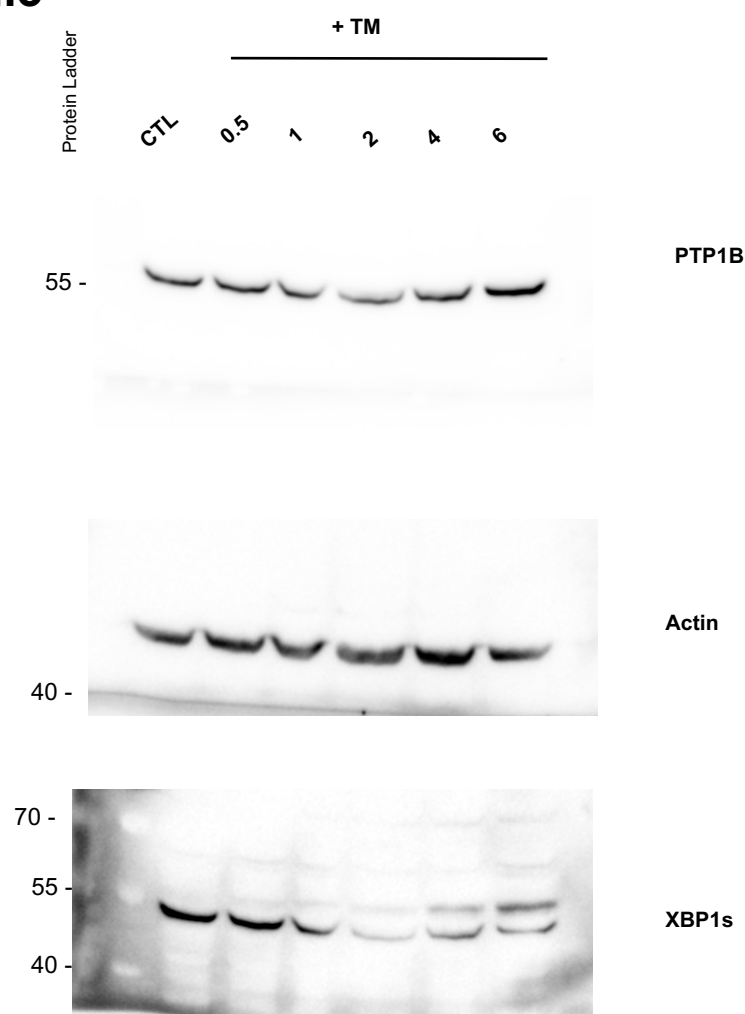

Supplement: inline-supplementary-material-1 [file inline-supplementary-material-1.zip]
